# Supplementary figures and images for: Real-World Effectiveness of Belimumab in Patients with Active Lupus
Source: MDPI journal article supplement (doi:10.3390/jcm12247627), 2023-12-11

Supplementary  
figure S1

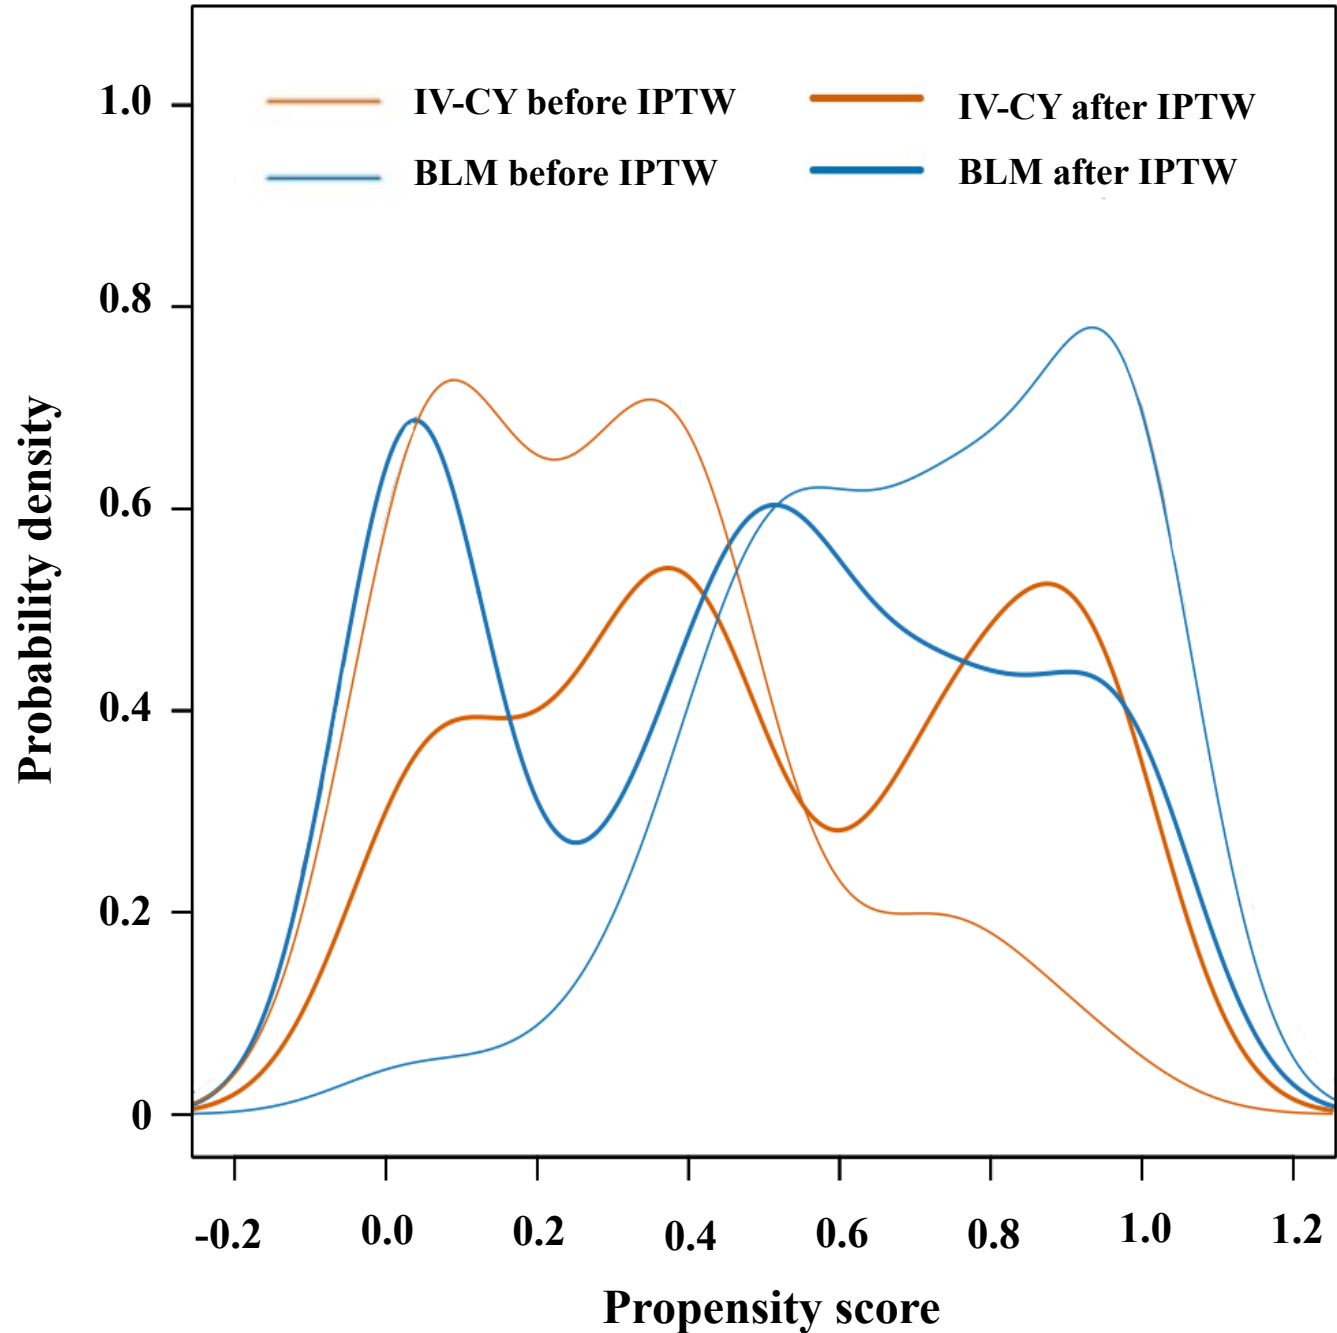

Supplement: s1 [file s1]
